# Supplementary material for: Cancer Associated Fibroblasts and Senescent Thyroid Cells in the Invasive Front of Thyroid Carcinoma
Source: PubMed Central journal article supplement (PMC7016563; doi:10.3390/cancers12010112), 2020-01-01
Supplement: cancers-12-00112-s001.pdf [file cancers-12-00112-s001.pdf]

# Supplementary Materials: Cancer Associated Fibroblasts and Senescent Thyroid Cells in the Invasive Front of Thyroid Carcinoma

Emanuela Minna, Silvia Brich, Katia Todoerti, Silvana Pilotti, Paola Collini, Elisa Bonaldi, Paola Romeo, Loris De Cecco, Matteo Dugo, Federica Perrone, Adele Busico, Andrea Vingiani, Ilaria Bersani, Andrea Anichini, Roberta Mortarini, Antonino Neri, Giancarlo Pruneri, Angela Greco and Maria Grazia Borrello

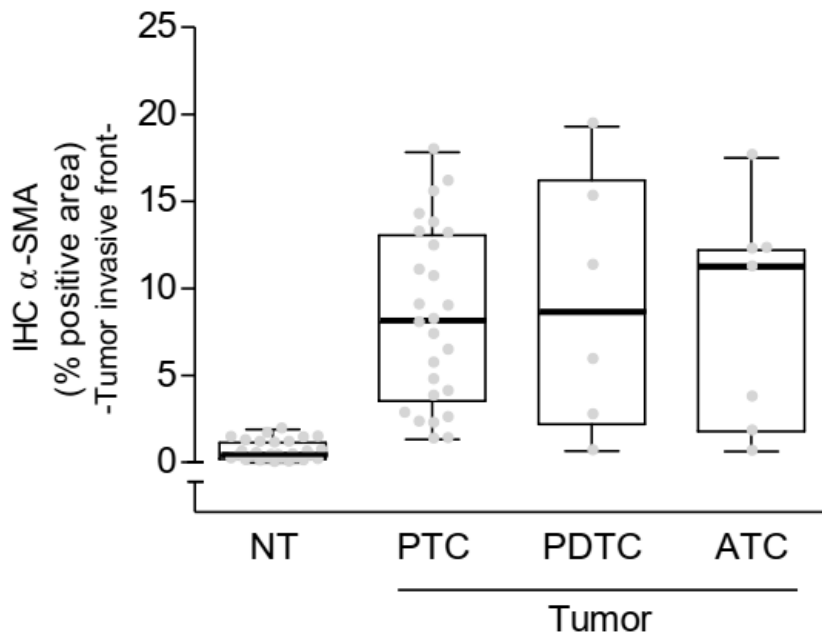

**Figure S1.** CAFs assessment by  $\alpha$ -SMA IHC staining in human thyroid cancers stratified for tumor histotype. Boxplot with scatterplot showing IHC results expressed as  $\alpha$ -SMA positive areas calculated by image digital quantification. Each dot represents the mean of 2-3 fields scored for samples; for tumor samples the results relative to invasive front are specifically showed. NT, non-neoplastic thyroid; PTC, papillary thyroid carcinoma; PDTC, poorly differentiated thyroid carcinoma; ATC, anaplastic thyroid carcinoma.

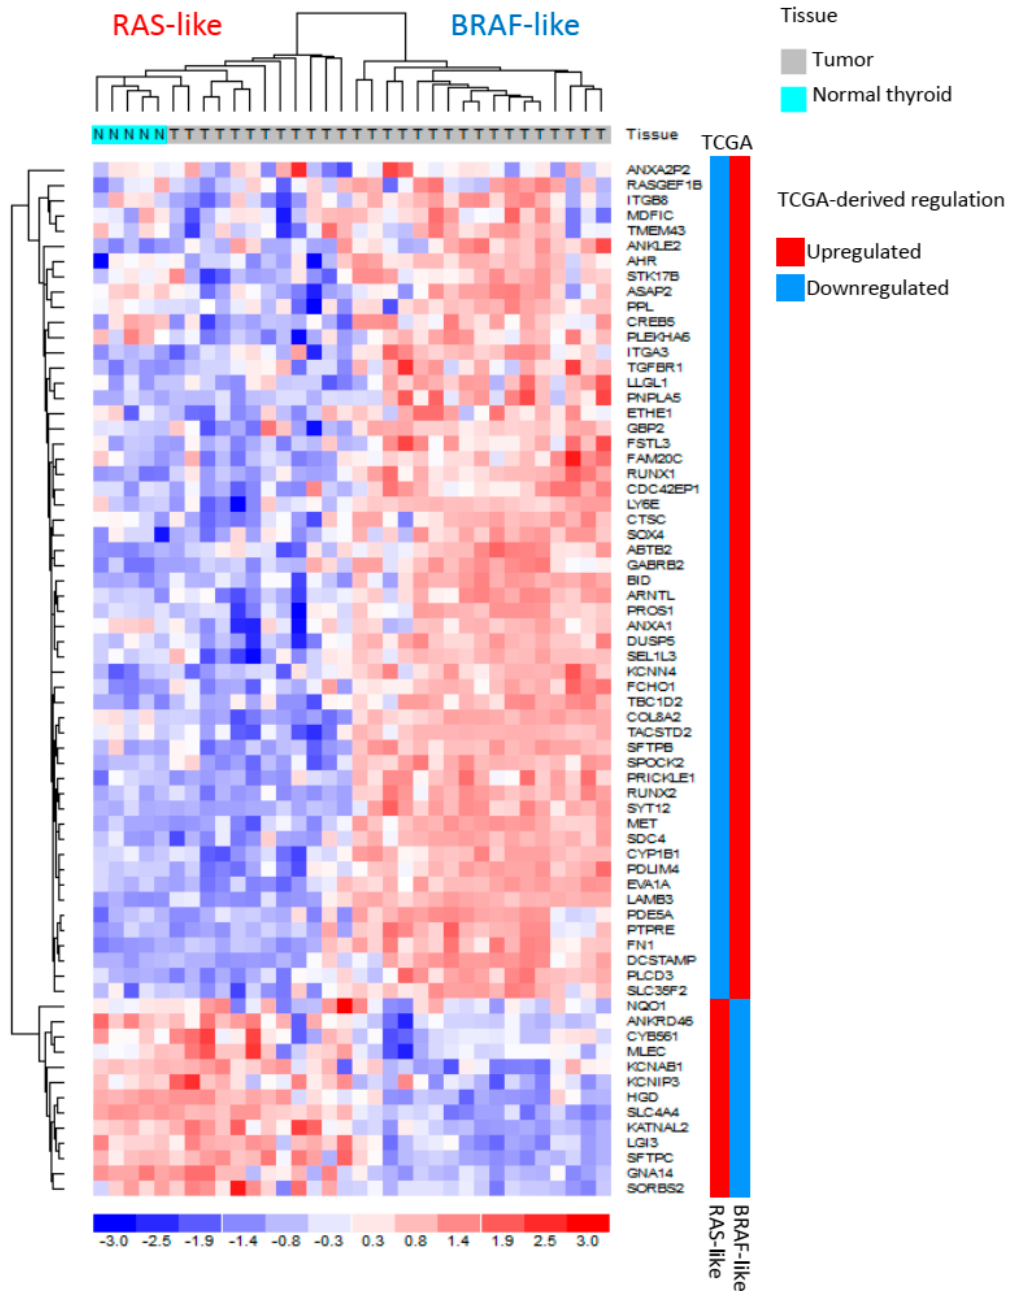

**Figure S2.** Unsupervised hierarchical clustering analysis of proprietary gene dataset on the TCGA derived BRAF-/RAS-like signature, using pearson’s correlation metric and average linkage method. The color scale bar represents the relative gene expression level normalized by the standard deviation. Color legend for tissue type is reported. The vertical bars on the right show the direction of regulation reported by TCGA: red lines show upregulated genes and blue lines show downregulated genes. According to TCGA classification: BRAF-like tissues display signature upregulation, indicative of MAPK pathway transcriptional activation, with only 13 out of the 71 genes

downregulated; RAS-like tissues display signature downregulation, with only the same 13 genes upregulated. Two main clusters are identified with expression pattern consistent with BRAF- or RAS-type. The BRAF-/RAS-like signaling class was attributed to our tissues based on BRAF-/RAS- clustering classification.

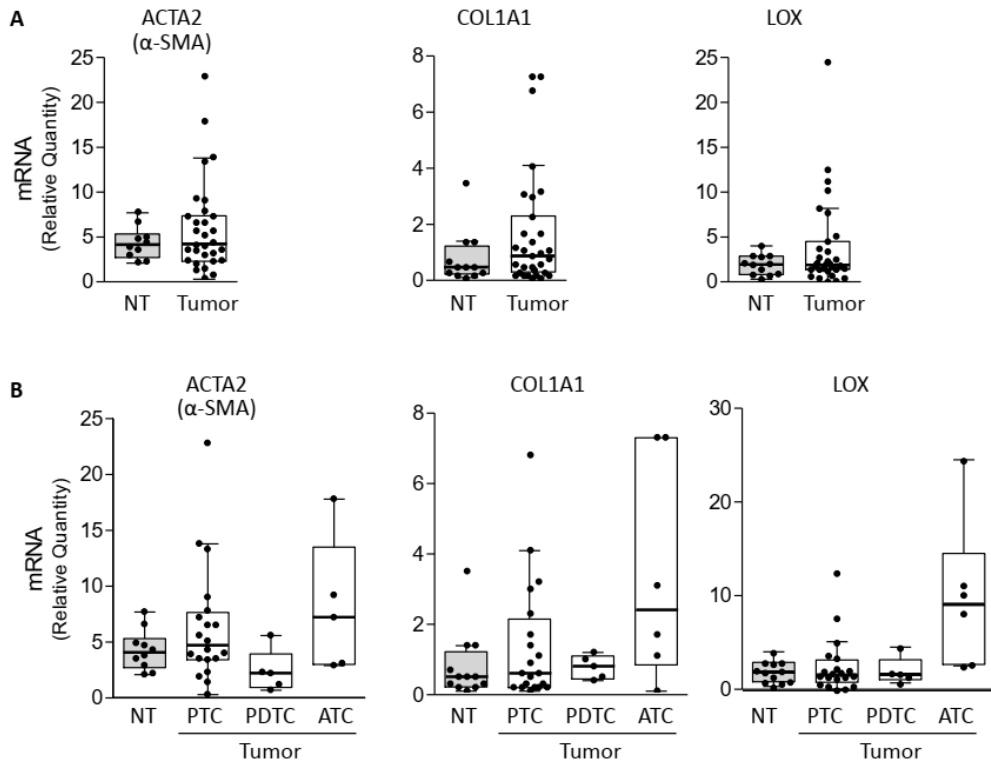

**Figure S3.**  $\alpha$ -SMA, *COL1A1* and *LOX* gene expression in human thyroid cancers by quantitative RT-PCR. Boxplot with scatterplot showing mRNA expression of  $\alpha$ -SMA (*ACTA2* gene), *COL1A1* and *LOX* genes in (A) non- neoplastic thyroids (NT) and thyroid tumors and in (B) tumors stratified for histotype. qRT-PCR data are shown as relative quantity normalized to HPRT gene used as endogenous control for RNA input normalization. Each dot represents the mean of 3 technical replicates.

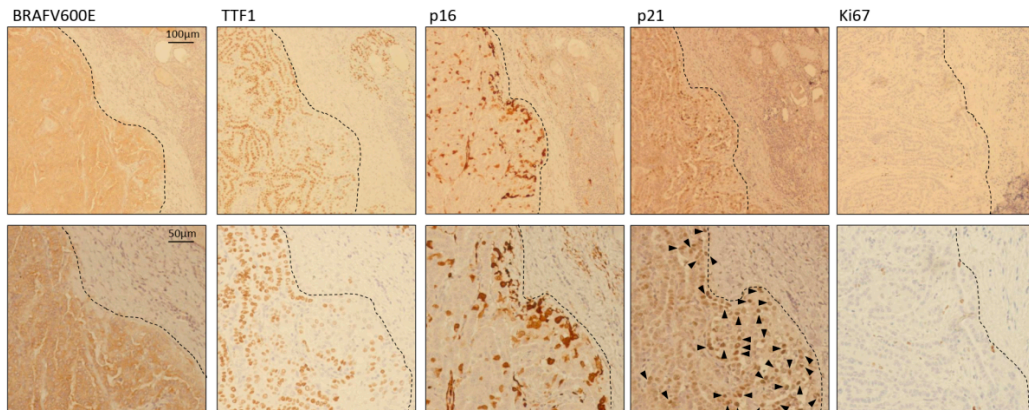

**Figure S4.** Assessment of senescence markers by IHC staining in human thyroid cancers. Representative images of a tumor serial sections immunostained for the expression of BRAFV600E (marker for BRAFV600E mutated thyroid tumor cells), TTF1 (marker for thyroid cells), p16(alias INK4a) and p21(alias CIP1) (cell cycle inhibitors; markers for cellular senescence) and Ki67 (cell proliferation marker). The area of the invasive front is highlighted by dashed lines and is specifically shown. Two different magnification are shown. Black triangles indicate representative p21 positive nuclei. Immunostaining was performed as described in Materials and Methods; anti-p21 (C-19: sc-397, Santa Cruz Biotechnology) and anti-Ki67 (MIB1 clone, Dako) were used for the additional markers.

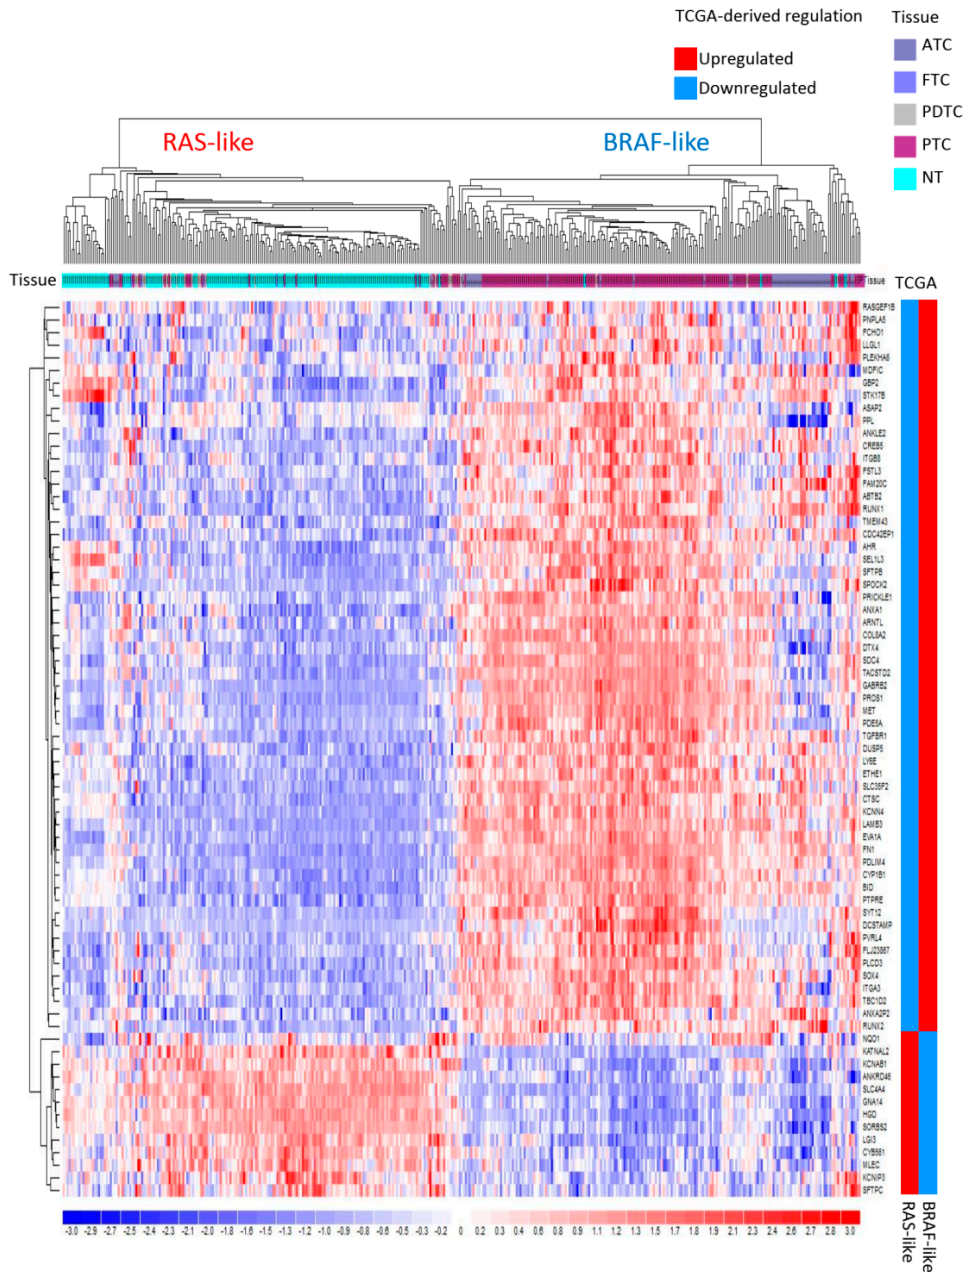

**Figure S5.** Unsupervised hierarchical clustering analysis of 407 samples derived from GEO datasets on the TCGA derived BRAF-/RAS-like signature, using Pearson's correlation metric and average linkage method. The color scale bar represents the relative gene expression level normalized by the standard deviation. Color legend for tissue type is reported. The vertical bars on the right show the direction of regulation reported by TCGA: red lines show upregulated genes and blue lines show downregulated genes. The BRAF-/RAS-like signaling class was attributed based on BRAF-/RAS- clustering classification.

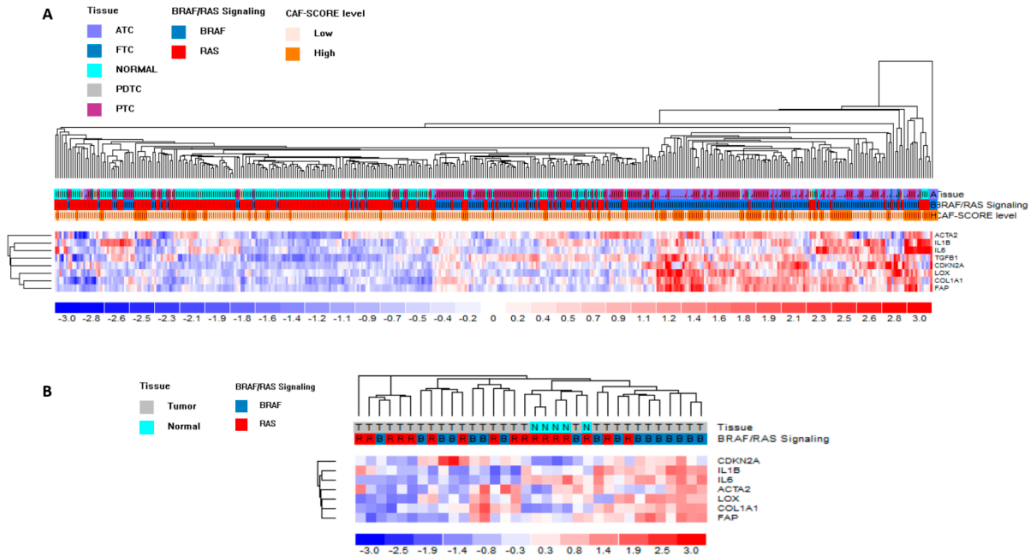

**Figure S6.** Unsupervised hierarchical clustering analysis of GEO derived and proprietary gene datasets on CAF activating factors. The expression of three factors (*TGF- $\beta$ 1*, *IL-1* and *IL-6*) reported in the activation of CAFs is showed concurrently with *LOX*, *COL1A1*, CAF (*FAP* and  $\alpha$ -*SMA* –alias *ACTA2*-) and senescent cells (*p16* –alias *CDKN2A*-) markers in the 407 samples derived from GEO datasets (**A**) and in the proprietary gene dataset (**B**); in this latter only *IL-1* and *IL-6* expression data were available. The color scale bar represents the relative gene expression levels normalized by the standard deviation. Color legend is reported.

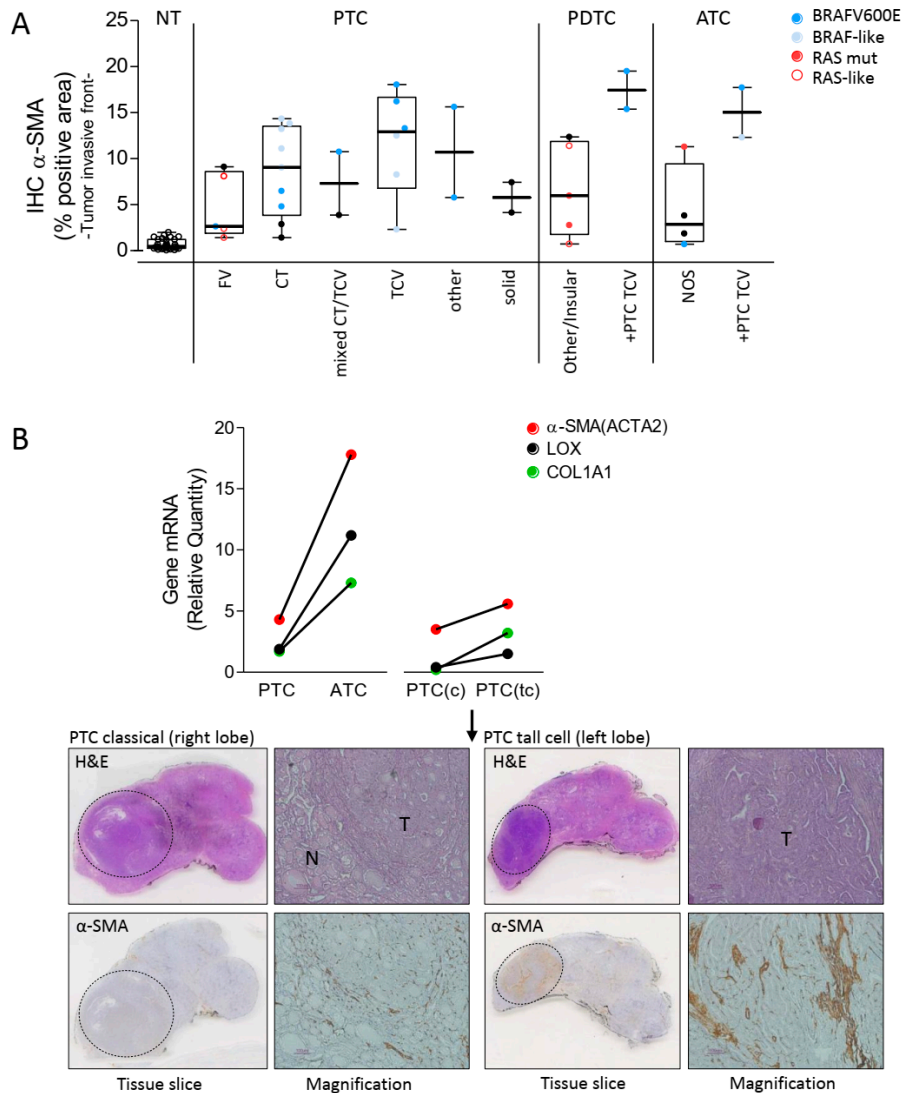

**Figure S7. A.** CAFs assessment by  $\alpha$ -SMA IHC staining in human thyroid cancers stratified for tumor histotype, variant and gene drivers. Boxplot with scatterplot showing  $\alpha$ -SMA IHC results by image digital quantification. Each dot represents the mean of 2-3 fields scored for samples; for tumor samples data about invasive front are specifically showed. Color legend indicates gene drivers or BRAF-/RAS-like signaling; tumors with unknown gene drivers or signaling are in black. **B.**  $\alpha$ -SMA, LOX and COL1A1 gene expression by quantitative RT-PCR in matched tumor tissues from 2 patients of our case list. Below representative H&E and  $\alpha$ -SMA immunostained tissue sections and the corresponding magnification for the indicated patient. NT, non-neoplastic thyroid; PTC, papillary thyroid carcinoma; PDTC, poorly differentiated thyroid carcinoma; ATC, anaplastic thyroid carcinoma; FV, follicular variant; CT, classical variant; TCV, tall cell variant; NOS, not otherwise specified.

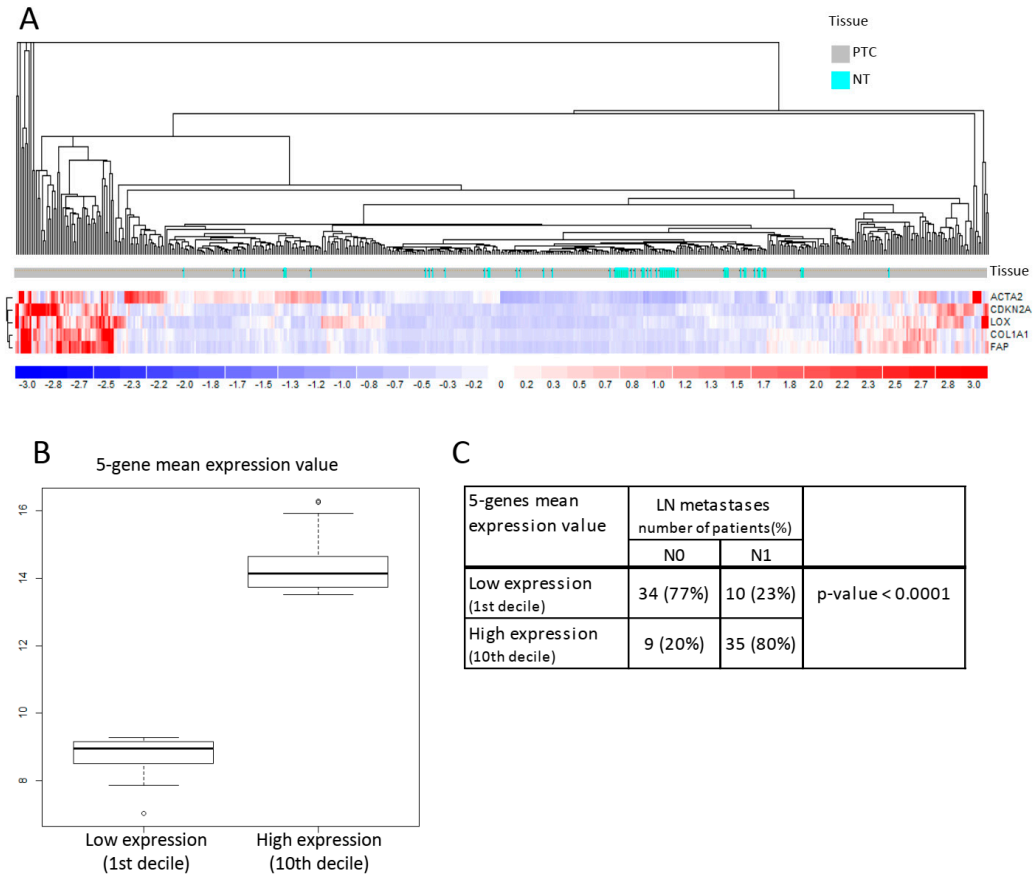

**Figure S8. A.** Unsupervised hierarchical clustering analysis of 486 papillary thyroid carcinomas (PTCs) and 58 non- neoplastic thyroids (NTs) from TCGA dataset on the five target genes expression. *α-SMA* and *p16* are indicated by the corresponding gene symbol, *ACTA2* and *CDKN2A*, respectively. The color scale bar represents the relative gene expression level normalized by the standard deviation. Color legend is reported for tissue type. **B.** Boxplot of the 5 gene mean expression value (log scale) calculated for 436 PTCs from TCGA for which clinical data about lymph node status (N0, N1, N1a, N1b) was available. The 1st decile and the 10th decile are specifically showed; Wilcoxon rank sum test measures the highly significant difference ( $p$ -value <  $2.2 \times 10^{-16}$ ) between this two groups (44 samples in each group). **C.** Distribution of PTC patients stratified for the 5-gene mean expression class in relation to the absence (N0) or presence (N1/N1a/N1b) of lymph node (LN) metastases. The statistically significance by two-tailed Fisher's exact test is indicated.



Table S1. Human thyroid tumors clinicopathological features.

|   | ID | Histotype        | Variant                     | Age | Gender | T    | N   | M  | Specimen Preservation | Driving lesion | GEP              | BRAF-/RAS-signaling    | Paired RNA from NT |
|---|----|------------------|-----------------------------|-----|--------|------|-----|----|-----------------------|----------------|------------------|------------------------|--------------------|
| A | 1  | PTC              | TCV                         | 50  | F      | T2-3 | N0  | MX | FFPE                  | BRAFV600E      | NA               | NA                     | Yes                |
|   | 2  | PTC+PDTC         | TCV                         | 61  | F      | T3   | N0  | MX | FFPE                  | BRAFV600E      | NA               | NA                     | Yes                |
|   | 3  | PTC+PDTC         | TCV                         | 49  | F      | T3   | N0  | MX | FFPE                  | BRAFV600E      | NA               | NA                     | No                 |
|   | 4  | PTC(+ATC)        | TCV                         | 85  | F      | NA   | NA  | NA | FFPE                  | BRAFV600E      | NA               | NA                     | No                 |
|   | 5  | PTC              | TCV                         | 63  | F      | T2   | N0  | MX | FFPE                  | wt             | NA               | NA                     | No                 |
|   | 6  | PTC              | Classical                   | 22  | F      | T4a  | N1b | M1 | FFPE                  | wt             | NA               | NA                     | No                 |
|   | 7  | ATC              | NOS                         | 67  | F      | NA   | NA  | NA | FFPE                  | wt             | NA               | NA                     | No                 |
|   | 8  | ATC+PTC          | spindle(ATC);TCV(PTC)       | 70  | M      | NA   | NA  | NA | FFPE                  | NRASQ61K       | NA               | NA                     | No                 |
|   | 9  | PTC              | Classical + TCV             | 44  | M      | T4   | N1a | MX | FFPE                  | BRAFV600E      | NA               | NA                     | Yes                |
|   | 10 | PTC              | Classical                   | 60  | F      | T2   | N0  | MX | FFPE                  | RET/PTC1       | NA               | NA                     | No                 |
|   | 11 | PDTC+ATC         | NOS                         | 49  | M      | T4a  | N1b | MX | FFPE                  | TRK fusion     | NA               | NA                     | No                 |
|   | 12 | PTC              | Classical+TCV               | 31  | F      | NA   | NA  | NA | FFPE                  | TRK fusion     | NA               | NA                     | Yes                |
|   | 13 | ATC              | NOS                         | 77  | F      | NA   | NA  | NA | FFPE                  | BRAFV600E      | NA               | NA                     | No                 |
|   | 14 | ATC              | NOS                         | 73  | F      | NA   | NA  | NA | FFPE                  | wt             | NA               | NA                     | Yes                |
|   | 15 | PTC              | Other                       | 64  | F      | T3   | N0  | MX | FFPE                  | BRAFV600E      | NA               | NA                     | No                 |
|   | 16 | PTC              | Other                       | 45  | F      | T4   | N1a | MX | FFPE                  | BRAFV600E      | NA               | NA                     | No                 |
|   | 17 | PTC              | TCV                         | 35  | M      | T3   | N1b | MX | FFPE                  | BRAFV600E      | NA               | NA                     | No                 |
|   | 18 | PTC              | FV                          | 42  | M      | T1   | N0  | MX | FFPE                  | wt             | NA               | NA                     | No                 |
|   | 19 | PTC              | FV                          | 30  | M      | T1   | N0  | MX | FFPE                  | BRAFV600E      | NA               | NA                     | No                 |
|   | 20 | PTC <sup>1</sup> | solid/trabecular            | 29  | M      | T4a  | N1b | M1 | FFPE                  | NA             | NA               | NA                     | No                 |
|   | 21 | PDTC+ATC         | TCV(PDTC);small cells (ATC) | 67  | F      | T4a  | N1b | M1 | FFPE/Frozen           | wt             | Yes              | BRAF-like              | No                 |
|   | 22 | PTC              | Classical                   | 26  | F      | T3   | N1a | M0 | FFPE/Frozen           | RET fusion     | Yes              | BRAF-like              | Yes                |
|   | 23 | PTC              | Classical                   | 46  | M      | T3   | N1a | M0 | FFPE/Frozen           | wt             | Yes              | BRAF-like              | No                 |
|   | 24 | PDTC             | Insular                     | 73  | M      | T4a  | N1b | M1 | FFPE/Frozen           | wt             | Yes              | RAS-like               | No                 |
|   | 25 | PTC              | Classical                   | 38  | F      | T3m  | N1b | M0 | FFPE/Frozen           | wt             | Yes              | BRAF-like              | No                 |
|   | 26 | PTC              | Classical                   | 35  | M      | T3m  | N1a | M0 | FFPE/Frozen           | wt             | Yes <sup>2</sup> | BRAF-like              | No                 |
|   | 27 | PTC              | FV                          | 36  | M      | T3   | NX  | M0 | FFPE/Frozen           | wt             | Yes              | RAS-like               | Yes                |
|   | 28 | PDTC             | Insular                     | 41  | M      | T3m  | NX  | M0 | FFPE/Frozen           | HRASQ61K       | Yes              | BRAF-like <sup>3</sup> | No                 |
|   | 29 | PDTC+PTC         | Insular(PDTC);TCV(PTC)      | 74  | M      | T3   | NX  | M1 | FFPE/Frozen           | KRASQ61R       | Yes              | RAS-like               | No                 |
|   | 30 | PTC              | Solid                       | 72  | F      | T3   | N1b | M1 | FFPE/Frozen           | wt             | Yes              | RAS-like               | No                 |
|   | 31 | PTC              | FV                          | 51  | F      | T3   | N0  | M0 | FFPE/Frozen           | wt             | Yes              | RAS-like               | Yes                |
|   | 32 | PTC              | Classical                   | 33  | F      | T3   | N1b | M0 | FFPE/Frozen           | RET fusion     | Yes              | BRAF-like              | No                 |
|   | 33 | PTC              | Classical                   | 38  | F      | T3   | NX  | M0 | FFPE/Frozen           | BRAFV600E      | Yes              | BRAF-like              | Yes                |
|   | 34 | PTC              | TCV                         | 48  | F      | T3   | N1a | M0 | FFPE/Frozen           | wt             | Yes              | BRAF-like              | Yes                |
|   | 35 | PDTC+PTC         | Insular(PDTC);TCV(PTC)      | 52  | F      | T3m  | NX  | M0 | FFPE/Frozen           | wt             | Yes              | RAS-like               | Yes                |

|          |    |                  |                   |    |   |     |     |    |             |            |     |           |     |
|----------|----|------------------|-------------------|----|---|-----|-----|----|-------------|------------|-----|-----------|-----|
|          | 36 | PTC              | Classical         | 37 | F | T2  | N1a | M0 | FFPE/Frozen | BRAFV600E  | Yes | BRAF-like | Yes |
|          | 37 | PTC              | TCV               | 75 | F | T3m | N1a | M1 | FFPE/Frozen | wt         | Yes | BRAF-like | No  |
|          | 38 | PTC              | TCV               | 70 | F | T3m | N1b | M0 | FFPE/Frozen | BRAFV600E  | Yes | BRAF-like | No  |
|          | 39 | PDTC             | mixed Insular/TCV | 74 | M | T3  | NX  | M1 | FFPE/Frozen | KRASQ61R   | Yes | RAS-like  | No  |
|          | 40 | PTC              | FV                | 38 | F | 2   | NX  | M0 | FFPE/Frozen | wt         | Yes | RAS-like  | No  |
|          | 41 | PTC              | TCV               | 51 | F | T3  | N0  | M0 | FFPE/Frozen | BRAFV600E  | Yes | BRAF-like | Yes |
|          | 42 | PTC              | FV                | 52 | F | T3  | NX  | M0 | FFPE/Frozen | RET fusion | Yes | RAS-like  | No  |
|          | 43 | PTC              | FV                | 39 | F | T3  | NX  | M0 | FFPE/Frozen | NRASQ61R   | Yes | RAS-like  | No  |
| <b>B</b> |    | PTC <sup>1</sup> | Classical         | 44 | F | NA  | NA  | NA | Frozen      | NA         | Yes | BRAF-like | NA  |
|          |    | PTC <sup>1</sup> | TCV               | 35 | F | T3m | N1b | M0 | Frozen      | BRAFV600E  | Yes | BRAF-like | NA  |
|          |    | PTC+PDTC         | FV(PTC)           | 44 | F | T3  | NX  | M1 | Frozen      | NA         | Yes | RAS-like  | NA  |
|          |    | PTC              | TCV               | 61 | F | T2m | N1a | M0 | Frozen      | NA         | Yes | BRAF-like | NA  |
|          |    | PTC              | Classical         | 58 | M | T1  | N1b | M1 | Frozen      | NA         | Yes | RAS-like  | NA  |

Abbreviation: PTC, papillary thyroid carcinoma; PDTC, poorly differentiated thyroid carcinoma; ATC, anaplastic thyroid carcinoma; TCV, tall cell variant; FV, follicular variant; NOS, not otherwise specified; GEP, gene expression profile; NA, not available; wt, wild type referred to the tested driving lesions (see materials and methods). <sup>1</sup> LFN metastasis; <sup>2</sup> Both Primary and a LFN metastasis were profiled by GEP; <sup>3</sup> Possible aggressive case with RAS mutation but BRAF-like signaling as described in reference [5]. **A.** The series of 43 TC patients investigated in the present study. **B.** Five additional TC patients for which only frozen tissue and gene expression profiles were available. This samples are included in the gene expression analysis reported in Figure 5.

**Table S2.** Driving lesion and BRAF-/RAS-signaling in the 254 tumor samples from GEO datasets.

|    | Type | Lesion   | Signaling |    | Type | Lesion     | Signaling    |     | Type | Lesion     | Signaling |
|----|------|----------|-----------|----|------|------------|--------------|-----|------|------------|-----------|
| 1  | PTC  | BRAF mut | BRAF-like | 55 | PTC  | RET fusion | BRAF-like    | 109 | PTC  | Unknown 2  | BRAF-like |
| 2  | PTC  | BRAF mut | BRAF-like | 56 | PTC  | RET fusion | BRAF-like    | 110 | PTC  | Unknown 2  | BRAF-like |
| 3  | PTC  | BRAF mut | BRAF-like | 57 | PTC  | RET fusion | BRAF-like    | 111 | PTC  | Unknown 2  | BRAF-like |
| 4  | PTC  | BRAF mut | BRAF-like | 58 | PTC  | RET fusion | BRAF-like    | 112 | PTC  | Unknown 2  | BRAF-like |
| 5  | PTC  | BRAF mut | BRAF-like | 59 | PTC  | RET fusion | BRAF-like    | 113 | PTC  | Unknown 3  | BRAF-like |
| 6  | PTC  | BRAF mut | BRAF-like | 60 | PTC  | RET fusion | BRAF-like    | 114 | PTC  | Unknown 1  | RAS-like  |
| 7  | PTC  | BRAF mut | BRAF-like | 61 | PTC  | RET fusion | BRAF-like    | 115 | PTC  | Unknown 1  | RAS-like  |
| 8  | PTC  | BRAF mut | BRAF-like | 62 | PTC  | RET fusion | BRAF-like    | 116 | PTC  | Unknown 1  | RAS-like  |
| 9  | PTC  | BRAF mut | BRAF-like | 63 | PTC  | RET fusion | BRAF-like    | 117 | PTC  | Unknown 1  | RAS-like  |
| 10 | PTC  | BRAF mut | BRAF-like | 64 | PTC  | RET fusion | BRAF-like    | 118 | PTC  | Unknown 2  | RAS-like  |
| 11 | PTC  | BRAF mut | BRAF-like | 65 | PTC  | RET fusion | BRAF-like    | 119 | PTC  | Unknown 2  | RAS-like  |
| 12 | PTC  | BRAF mut | BRAF-like | 66 | PTC  | RET fusion | BRAF-like    | 120 | PTC  | Unknown 2  | RAS-like  |
| 13 | PTC  | BRAF mut | BRAF-like | 67 | PTC  | RET fusion | BRAF-like    | 121 | PTC  | Unknown 3  | RAS-like  |
| 14 | PTC  | BRAF mut | BRAF-like | 68 | PTC  | RET fusion | BRAF-like    | 122 | PTC  | Unknown 3  | RAS-like  |
| 15 | PTC  | BRAF mut | BRAF-like | 69 | PTC  | RET fusion | BRAF-like    | 123 | PTC  | Unknown 3  | RAS-like  |
| 16 | PTC  | BRAF mut | BRAF-like | 70 | PTC  | RET fusion | BRAF-like    | 124 | PTC  | Unknown 3  | RAS-like  |
| 17 | PTC  | BRAF mut | BRAF-like | 71 | PTC  | RET fusion | RAS-like     | 125 | PTC  | Unknown 2  | BRAF-like |
| 18 | PTC  | BRAF mut | BRAF-like | 72 | PTC  | RET fusion | RAS-like     | 126 | PTC  | Unknown 2  | BRAF-like |
| 19 | PTC  | BRAF mut | BRAF-like | 73 | PTC  | RET fusion | RAS-like     | 127 | PTC  | Unknown 2  | BRAF-like |
| 20 | PTC  | BRAF mut | BRAF-like | 74 | PTC  | RAS mut    | RAS-like     | 128 | PTC  | Unknown 4  | BRAF-like |
| 21 | PTC  | BRAF mut | BRAF-like | 75 | PTC  | RAS mut    | RAS-like     | 129 | PTC  | Unknown 4  | BRAF-like |
| 22 | PTC  | BRAF mut | BRAF-like | 76 | PTC  | RAS mut    | RAS-like     | 130 | PTC  | Unknown 4  | RAS-like  |
| 23 | PTC  | BRAF mut | BRAF-like | 77 | PTC  | RAS mut    | RAS-like     | 131 | PTC  | Unknown 4  | BRAF-like |
| 24 | PTC  | BRAF mut | BRAF-like | 78 | PTC  | RAS mut    | RAS-like     | 132 | PTC  | Unknown 4  | BRAF-like |
| 25 | PTC  | BRAF mut | BRAF-like | 79 | PTC  | RAS mut    | BRAF-like ** | 133 | PTC  | Unknown 4  | RAS-like  |
| 26 | PTC  | BRAF mut | BRAF-like | 80 | PTC  | PAX8/PPARG | RAS-like     | 134 | PTC  | Unknown 4  | BRAF-like |
| 27 | PTC  | BRAF mut | BRAF-like | 81 | PTC  | Unknown 1  | BRAF-like    | 135 | PTC  | Unknown 4  | BRAF-like |
| 28 | PTC  | BRAF mut | BRAF-like | 82 | PTC  | Unknown 1  | BRAF-like    | 136 | PTC  | Unknown 4  | BRAF-like |
| 29 | PTC  | BRAF mut | BRAF-like | 83 | PTC  | Unknown 1  | BRAF-like    | 137 | PDTC | BRAF mut   | BRAF-like |
| 30 | PTC  | BRAF mut | BRAF-like | 84 | PTC  | Unknown 1  | BRAF-like    | 138 | PDTC | BRAF mut   | BRAF-like |
| 31 | PTC  | BRAF mut | BRAF-like | 85 | PTC  | Unknown 1  | BRAF-like    | 139 | PDTC | RET fusion | BRAF-like |
| 32 | PTC  | BRAF mut | BRAF-like | 86 | PTC  | Unknown 1  | BRAF-like    | 140 | PDTC | ALK fusion | RAS-like  |
| 33 | PTC  | BRAF mut | BRAF-like | 87 | PTC  | Unknown 1  | BRAF-like    | 141 | PDTC | RAS mut    | RAS-like  |
| 34 | PTC  | BRAF mut | BRAF-like | 88 | PTC  | Unknown 1  | BRAF-like    | 142 | PDTC | RAS mut    | RAS-like  |
| 35 | PTC  | BRAF mut | BRAF-like | 89 | PTC  | Unknown 1  | BRAF-like    | 143 | PDTC | RAS mut    | RAS-like  |
| 36 | PTC  | BRAF mut | BRAF-like | 90 | PTC  | Unknown 1  | BRAF-like    | 144 | PDTC | RAS mut    | RAS-like  |
| 37 | PTC  | BRAF mut | BRAF-like | 91 | PTC  | Unknown 1  | BRAF-like    | 145 | PDTC | RAS mut    | RAS-like  |

|    |     |            |           |     |     |           |           |     |      |            |           |
|----|-----|------------|-----------|-----|-----|-----------|-----------|-----|------|------------|-----------|
| 38 | PTC | BRAF mut   | BRAF-like | 92  | PTC | Unknown 1 | BRAF-like | 146 | PDTC | RAS mut    | RAS-like  |
| 39 | PTC | BRAF mut   | BRAF-like | 93  | PTC | Unknown 1 | BRAF-like | 147 | PDTC | RAS mut    | RAS-like  |
| 40 | PTC | BRAF mut   | BRAF-like | 94  | PTC | Unknown 1 | BRAF-like | 148 | PDTC | Unknown 5  | RAS-like  |
| 41 | PTC | BRAF mut   | BRAF-like | 95  | PTC | Unknown 1 | BRAF-like | 149 | PDTC | Unknown 5  | RAS-like  |
| 42 | PTC | BRAF mut   | BRAF-like | 96  | PTC | Unknown 1 | BRAF-like | 150 | PDTC | Unknown 5  | RAS-like  |
| 43 | PTC | BRAF mut   | BRAF-like | 97  | PTC | Unknown 1 | BRAF-like | 151 | PDTC | Unknown 5  | RAS-like  |
| 44 | PTC | BRAF mut   | BRAF-like | 98  | PTC | Unknown 1 | BRAF-like | 152 | PDTC | Unknown 5  | RAS-like  |
| 45 | PTC | BRAF mut   | BRAF-like | 99  | PTC | Unknown 1 | BRAF-like | 153 | PDTC | Unknown 5  | RAS-like  |
| 46 | PTC | BRAF mut   | RAS-like  | 100 | PTC | Unknown 1 | BRAF-like | 154 | PDTC | BRAF mut   | BRAF-like |
| 47 | PTC | RET fusion | BRAF-like | 101 | PTC | Unknown 1 | BRAF-like | 155 | PDTC | Unknown 2  | BRAF-like |
| 48 | PTC | RET fusion | BRAF-like | 102 | PTC | Unknown 1 | BRAF-like | 156 | PDTC | Unknown 2  | BRAF-like |
| 49 | PTC | RET fusion | BRAF-like | 103 | PTC | Unknown 1 | BRAF-like | 157 | PDTC | Unknown 3  | BRAF-like |
| 50 | PTC | RET fusion | BRAF-like | 104 | PTC | Unknown 1 | BRAF-like | 158 | PDTC | Unknown 3  | RAS-like  |
| 51 | PTC | RET fusion | BRAF-like | 105 | PTC | Unknown 2 | BRAF-like | 159 | FTC  | RAS mut    | RAS-like  |
| 52 | PTC | RET fusion | BRAF-like | 106 | PTC | Unknown 2 | BRAF-like | 160 | FTC  | PAX8/PPARG | RAS-like  |
| 53 | PTC | RET fusion | BRAF-like | 107 | PTC | Unknown 2 | BRAF-like | 161 | FTC  | Unknown 3  | RAS-like  |
| 54 | PTC | RET fusion | BRAF-like | 108 | PTC | Unknown 2 | BRAF-like | 162 | FTC  | Unknown 3  | RAS-like  |

Table S2. Cont.

|     | Type | Lesion    | Signaling   |     | Type | Lesion | Signaling |
|-----|------|-----------|-------------|-----|------|--------|-----------|
| 163 | ATC  | BRAF mut  | BRAF-like   | 214 | ATC  | NA     | BRAF-like |
| 164 | ATC  | BRAF mut  | BRAF-like   | 215 | PTC  | NA     | BRAF-like |
| 165 | ATC  | BRAF mut  | BRAF-like   | 216 | PTC  | NA     | BRAF-like |
| 166 | ATC  | BRAF mut  | BRAF-like   | 217 | PTC  | NA     | BRAF-like |
| 167 | ATC  | BRAF mut  | BRAF-like   | 218 | PTC  | NA     | BRAF-like |
| 168 | ATC  | BRAF mut  | BRAF-like   | 219 | PTC  | NA     | RAS-like  |
| 169 | ATC  | BRAF mut  | BRAF-like   | 220 | PTC  | NA     | BRAF-like |
| 170 | ATC  | BRAF mut  | BRAF-like   | 221 | PTC  | NA     | RAS-like  |
| 171 | ATC  | BRAF mut  | BRAF-like   | 222 | PTC  | NA     | BRAF-like |
| 172 | ATC  | BRAF mut  | BRAF-like   | 223 | PTC  | NA     | BRAF-like |
| 173 | ATC  | RAS mut   | BRAF-like * | 224 | PTC  | NA     | BRAF-like |
| 174 | ATC  | RAS mut   | BRAF-like * | 225 | PTC  | NA     | BRAF-like |
| 175 | ATC  | Other     | BRAF-like   | 226 | PTC  | NA     | RAS-like  |
| 176 | ATC  | Unknown 5 | BRAF-like   | 227 | PTC  | NA     | BRAF-like |
| 177 | ATC  | RAS mut   | BRAF-like * | 228 | PTC  | NA     | RAS-like  |
| 178 | ATC  | RAS mut   | BRAF-like * | 229 | PTC  | NA     | BRAF-like |
| 179 | ATC  | RAS mut   | BRAF-like * | 230 | PTC  | NA     | BRAF-like |
| 180 | ATC  | Other     | BRAF-like   | 231 | PTC  | NA     | BRAF-like |
| 181 | ATC  | BRAF mut  | RAS-like    | 232 | PTC  | NA     | BRAF-like |
| 182 | ATC  | Other     | RAS-like    | 233 | PTC  | NA     | BRAF-like |

|     |     |    |           |     |     |    |           |
|-----|-----|----|-----------|-----|-----|----|-----------|
| 183 | ATC | NA | BRAF-like | 234 | PTC | NA | BRAF-like |
| 184 | ATC | NA | BRAF-like | 235 | PTC | NA | BRAF-like |
| 185 | ATC | NA | BRAF-like | 236 | PTC | NA | RAS-like  |
| 186 | ATC | NA | RAS-like  | 237 | PTC | NA | BRAF-like |
| 187 | ATC | NA | BRAF-like | 238 | PTC | NA | BRAF-like |
| 188 | ATC | NA | BRAF-like | 239 | PTC | NA | BRAF-like |
| 189 | ATC | NA | RAS-like  | 240 | PTC | NA | BRAF-like |
| 190 | ATC | NA | BRAF-like | 241 | PTC | NA | BRAF-like |
| 191 | ATC | NA | BRAF-like | 242 | PTC | NA | BRAF-like |
| 192 | ATC | NA | BRAF-like | 243 | PTC | NA | BRAF-like |
| 193 | ATC | NA | BRAF-like | 244 | PTC | NA | BRAF-like |
| 194 | ATC | NA | BRAF-like | 245 | PTC | NA | BRAF-like |
| 195 | ATC | NA | BRAF-like | 246 | PTC | NA | RAS-like  |
| 196 | ATC | NA | BRAF-like | 247 | PTC | NA | BRAF-like |
| 197 | ATC | NA | BRAF-like | 248 | PTC | NA | BRAF-like |
| 198 | ATC | NA | BRAF-like | 249 | PTC | NA | BRAF-like |
| 199 | ATC | NA | BRAF-like | 250 | PTC | NA | BRAF-like |
| 200 | ATC | NA | BRAF-like | 251 | PTC | NA | BRAF-like |
| 201 | ATC | NA | BRAF-like | 252 | PTC | NA | BRAF-like |
| 202 | ATC | NA | BRAF-like | 253 | PTC | NA | BRAF-like |
| 203 | ATC | NA | BRAF-like | 254 | PTC | NA | BRAF-like |
| 204 | ATC | NA | BRAF-like |     |     |    |           |
| 205 | ATC | NA | BRAF-like |     |     |    |           |
| 206 | ATC | NA | BRAF-like |     |     |    |           |
| 207 | ATC | NA | BRAF-like |     |     |    |           |
| 208 | ATC | NA | BRAF-like |     |     |    |           |
| 209 | ATC | NA | BRAF-like |     |     |    |           |
| 210 | ATC | NA | BRAF-like |     |     |    |           |
| 211 | ATC | NA | BRAF-like |     |     |    |           |
| 212 | ATC | NA | BRAF-like |     |     |    |           |
| 213 | ATC | NA | BRAF-like |     |     |    |           |

NA: Not available; <sup>1</sup> BRAF mut and RET fusion wt; <sup>2</sup> BRAF mut wt; <sup>3</sup> RAS mut wt; <sup>4</sup> RET fusion wt; <sup>5</sup> None of MSK-IMPACT panel; \* RAS-mutant ATCs with BRAF-like signaling already described in Reference [5]. \*\* possible aggressive tumor resembling RAS-mutant ATCs with BRAF-like signaling \*

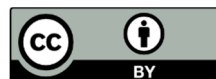

© 2020 by the authors. Submitted for possible open access publication under the terms and conditions of the Creative Commons Attribution (CC BY) license (<http://creativecommons.org/licenses/by/4.0/>).
